# Supplementary material for: A brain-derived insulin signal encodes protein satiety for nutrient-specific feeding inhibition
Source: Cell Rep. 2024 May 24;43(6):114282. doi: 10.1016/j.celrep.2024.114282 (PMC11220824; doi:10.1016/j.celrep.2024.114282)
Supplement: Document S1. Figures S1‒S7 [file mmc1.pdf]

**Cell Reports, Volume 43**

**Supplemental information**

**A brain-derived insulin signal  
encodes protein satiety  
for nutrient-specific feeding inhibition**

**Xiaoyu Li, Yang Yang, Xiaobing Bai, Xiaotong Wang, Houqi Tan, Yanbo Chen, Yan  
Zhu, Qili Liu, Mark N. Wu, and Yan Li**

## SUPPLEMENTAL INFORMATION

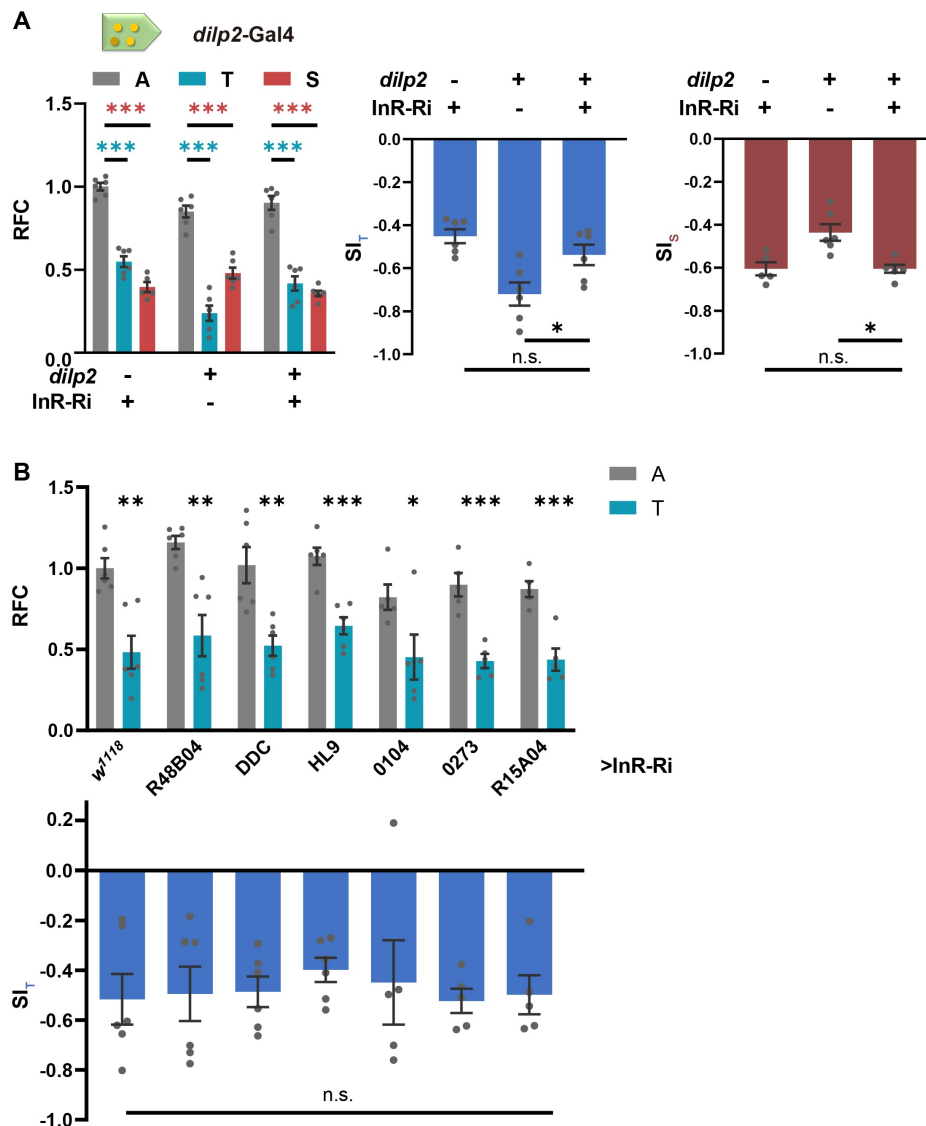

**Figure S1. Insulin signalling in IPCs and some DANs is not required for feeding inhibition.**

Related to Figure 1.

(A) Knockdown of InR in IPCs did not affect the PIFI or SIFI effect.  $n = 5-6$ .

(B) Knockdown of InR in various subsets of DANs did not affect the PIFI effect.  $n = 5-6$ .

$n$  represents the number of trials. Student's  $t$  test for Relative Food Consumption (RFC). One-way ANOVA, Dunnett test for Suppression Index (SI). \*,  $p < 0.05$ . \*\*,  $p < 0.01$ . \*\*\*,  $p < 0.001$ . n.s. indicates no statistical significance. The data are shown in Mean  $\pm$  S.E.M.

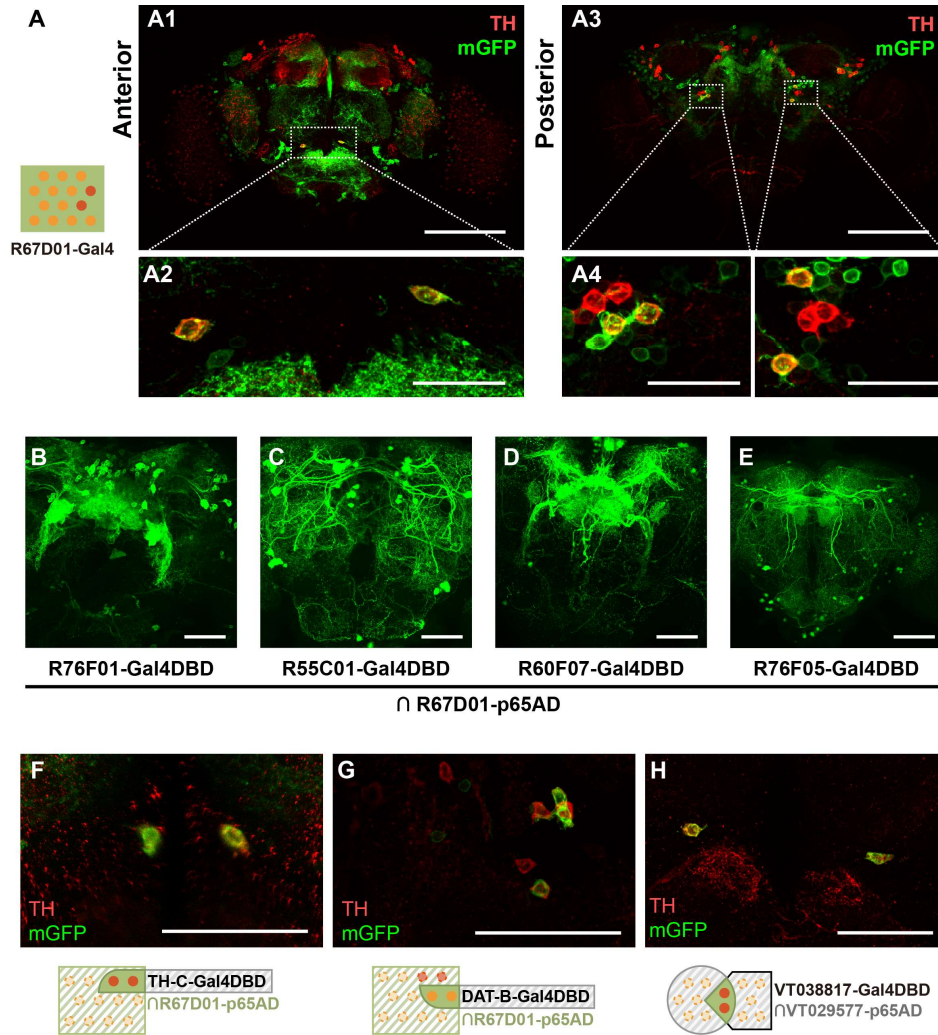

**Figure S2. Identification of two types of DANs in R67D01-labeled neurons.** Related to Figure 2.

- (A) TH staining (red) marks the cell bodies of two types of DANs in R67D01-neurons from the anterior view (A1) and the posterior view (A3). Scale bar, 100  $\mu$ m. A2 and A4 are the partial enlarged view of A1 and A3. Scale bar, 20  $\mu$ m.
- (B-E) The expression pattern of the split-Gal4 lines of R67D01-p65AD in combination with different Gal4DBD fly strains. Scale bar, 50  $\mu$ m.
- (F-H) The enlarged view of cell bodies of T1-Gal4 (Fig. 2A), PPM3-Gal4 (Fig. 2B) and T1'-Gal4 (Fig. 2C). Scale bar, 50  $\mu$ m.

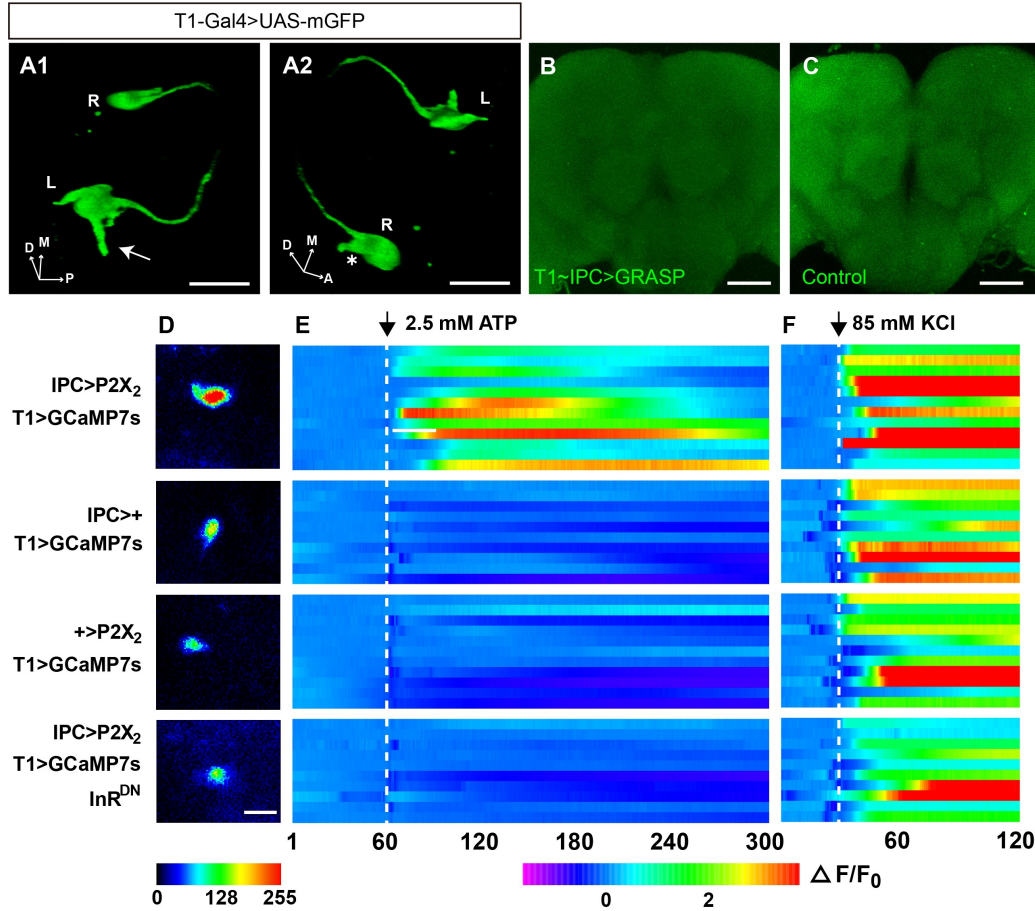

**Figure S3. No synaptic but functional connection between IPCs and T1-DANs.** Related to Figure 3.

- (A) The 3D illustration of filipodia-like (arrow) and lamellipodia-like (star) cellular protrusion of T1-DANs. R and L indicates the right and left side, respectively. Scale bar, 10  $\mu\text{m}$ .
- (B-C) There was no detectable GRASP signal between IPCs and T1-DANs. Scale bar, 50  $\mu\text{m}$ .
- (D) Activation of IPCs induced a remarkable increase in calcium levels of T1-DANs. Representative images in different groups. Scale bar, 15  $\mu\text{m}$ .
- (E-F) Each row in the heat map represents the  $\Delta F/F_0$  response of one T1-DANs neuron. Each pair of vertical dashed lines marks stimulation duration. The number of brains  $n = 10-12$ .



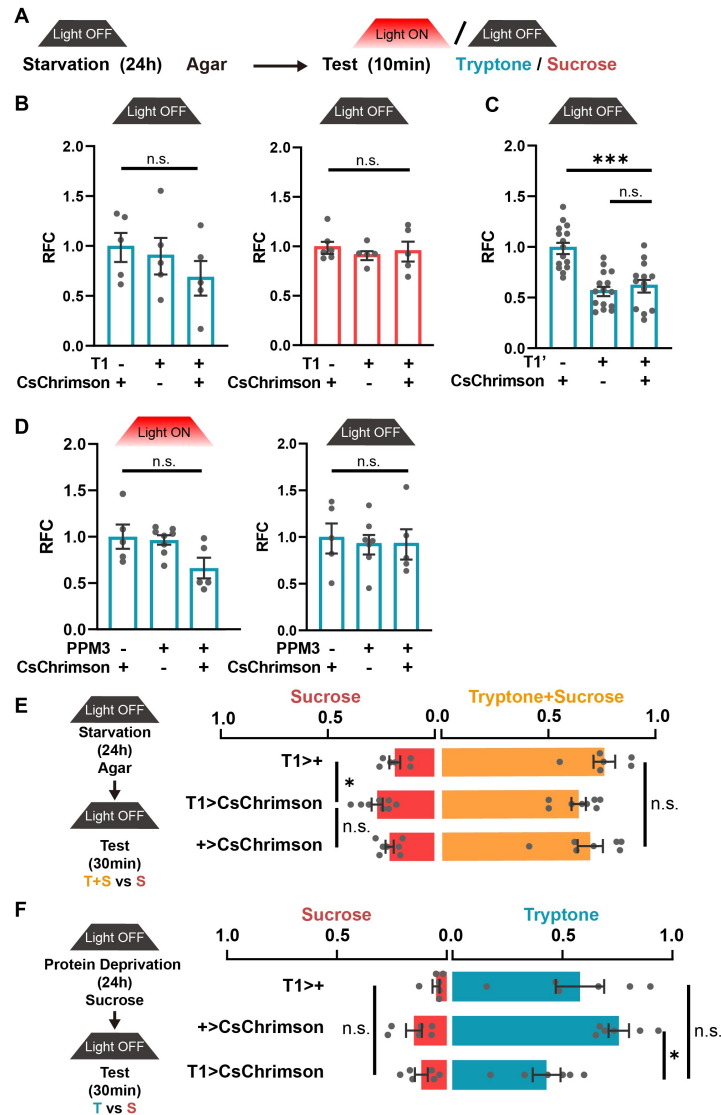

**Figure S5. Activation of PPM3-DANs does not affect protein feeding.** Related to Figure 5.

(A) The diagram of optogenetic manipulation in the feeding test.

(B-C) Flies showed comparable food consumption when light was OFF.  $n = 5-6$  in B.  $n = 13-15$  in C.

(D) Opto-activating PPM3-DANs did not affect protein intake.  $n = 5-8$ .

(E-F) Flies showed comparable choice index when light was OFF.  $n = 6-8$ .

$n$  represents the number of trials. One-way ANOVA, Dunnett test for Relative Food Consumption (RFC) in B-D and Choice Ratio in E and F. \*,  $p < 0.05$ . \*\*,  $p < 0.01$ . \*\*\*,  $p < 0.001$ . n.s. indicates no statistical significance. The data are shown in Mean  $\pm$  S.E.M.

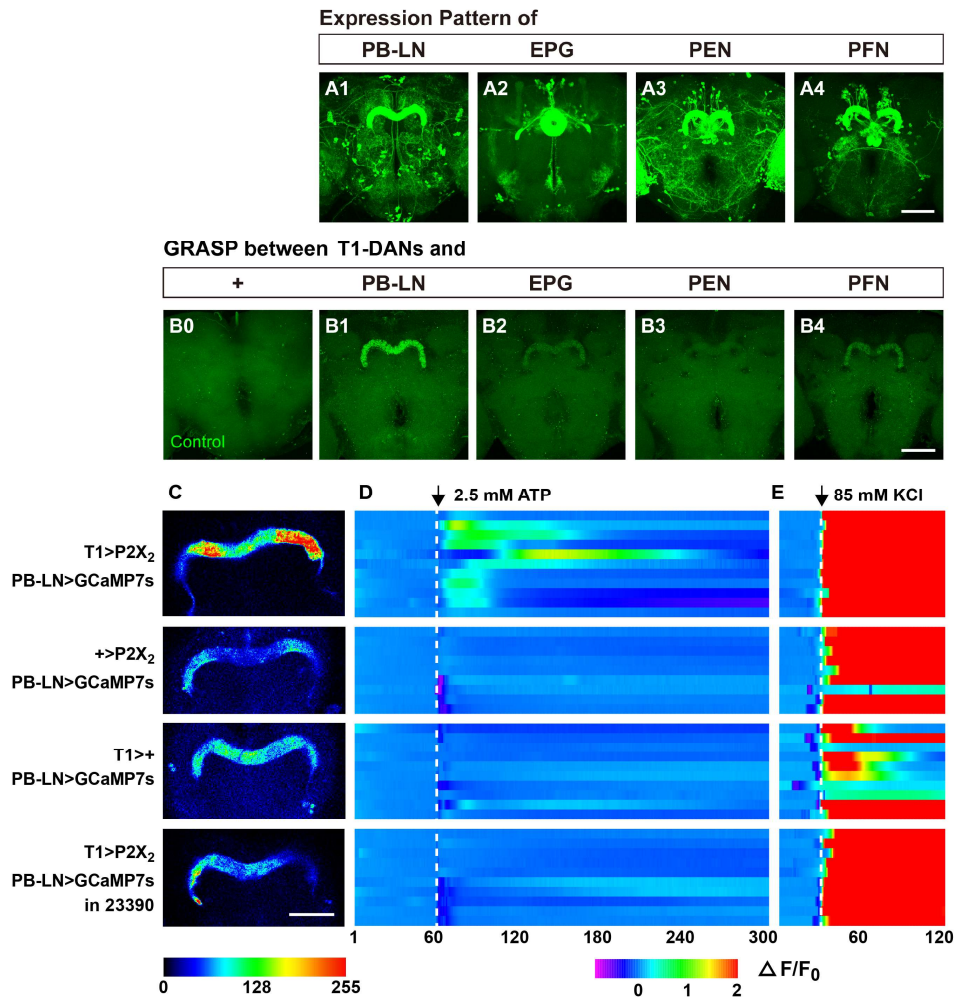

**Figure S6. T1-DANs form synaptic and functional connections with PB-LNs.** Related to Figure 6.

- (A) The expression pattern of different types of PB-projecting neurons.
- (B) The syb:GRASP between T1-DANs and PB-projecting neurons (B1-B4). B0 is the control with no PB-driver.
- (C) Activation of T1-DANs induced a remarkable increase in calcium levels of PB-LNs. Representative images in different groups.
- (D-E) Each row in the heat map represents the  $\Delta F/F_0$  response of individual PB-LNs. Each pair of vertical dashed lines marks stimulation duration. The number of brains  $n = 9-11$ .
- Scale bar, 50  $\mu m$ .

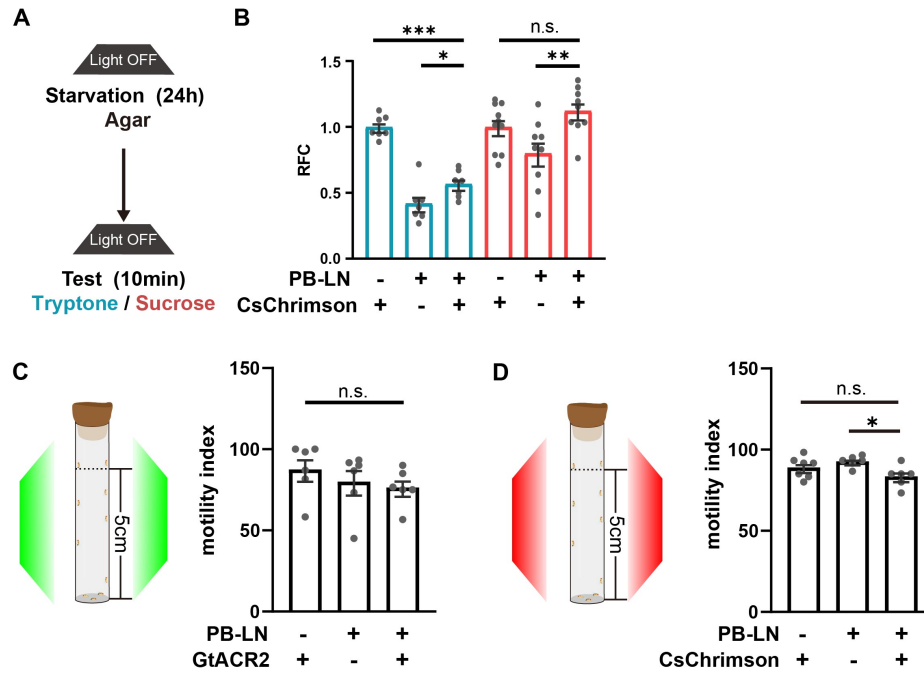

**Figure S7. Manipulation of PB-LNs does not affect motility.** Related to Figure 7.

(A-B) Flies showed comparable food consumption when light was OFF.  $n = 7-10$ .

(C) Silencing PB-LNs did not affect the climbing activity of flies.  $n = 6$ .

(D) Optogenetic activation of PB-LNs did not affect the climbing activity of flies.  $n = 6-7$ .

$n$  represents the number of trials. One-way ANOVA, Dunnett test. \*,  $p < 0.05$ . \*\*,  $p < 0.01$ . \*\*\*,  $p < 0.001$ . n.s. indicates no statistical significance. The data are shown in Mean  $\pm$  S.E.M.
